# Supplementary material for: Low Physical Performance Could Be Associated with Adverse Health Outcomes over Time: Results from a Cohort of Older Adults
Source: MDPI journal article supplement (doi:10.3390/ijerph21030319), 2024-03-09
Supplement: s1 [file s1]

**Table S1: Physical performance tests according to demographic, socioeconomic, behavioral and health-related characteristics.**

|                                          | Low Gait Speed (baseline) <sup>a</sup> |                            | Declined GS (2014-2019) <sup>b</sup> |                            | Low PP by TUG<br>(baseline) <sup>c</sup> |                            | Worsening TUG (2014-<br>2019) <sup>b</sup> |                            |
|------------------------------------------|----------------------------------------|----------------------------|--------------------------------------|----------------------------|------------------------------------------|----------------------------|--------------------------------------------|----------------------------|
| Variables                                | N*                                     | <i>p-value<sup>d</sup></i> | N**                                  | <i>p-value<sup>d</sup></i> | N*                                       | <i>p-value<sup>d</sup></i> | N**                                        | <i>p-value<sup>d</sup></i> |
|                                          | 1305                                   | % (95%CI)                  | 476                                  | % (95%CI)                  | 1433                                     | % (95%CI)                  | 471                                        | % (95%CI)                  |
| <b>Sex</b>                               |                                        | <b>0.001</b>               |                                      | <b>0.099</b>               |                                          | <b>0.003</b>               |                                            | <b>0.256</b>               |
| Female                                   | 68                                     | 22.3 (18.0; 27.4)          | 198                                  | 65.1 (59.6; 70.3)          | 99                                       | 32.4 (27.3; 37.8)          | 118                                        | 71.5 (64.1; 77.9)          |
| Male                                     | 16                                     | 9.7 (6.0; 15.3)            | 120                                  | 72.3 (65.4; 79.0)          | 32                                       | 19.4 (14.0; 26.2)          | 203                                        | 66.3 (60.8; 71.4)          |
| <b>Age (completed years)</b>             |                                        | <b>&lt;0.001</b>           |                                      | <b>0.926</b>               |                                          | <b>&lt;0.001</b>           |                                            | <b>0.329</b>               |
| 60-69                                    | 34                                     | 11.9 (8.06 16.2)           | 195                                  | 68.2 (62.5; 73.3)          | 55                                       | 19.3 (15.1; 24.3)          | 189                                        | 66.3 (60.6; 71.6)          |
| 70-79                                    | 29                                     | 19.7 (14.1; 27.0)          | 98                                   | 66.7 (58.6; 73.8)          | 50                                       | 33.6 (26.4; 41.5)          | 103                                        | 69.1 (61.2; 76.0)          |
| 80+                                      | 21                                     | 58.3 (41.9; 73.1)          | 25                                   | 69.4 (52.7; 82.2)          | 26                                       | 70.3 (53.8; 82.7)          | 29                                         | 78.4 (62.3; 88.8)          |
| <b>Skin color</b>                        |                                        | <b>0.277</b>               |                                      | <b>0.525</b>               |                                          | <b>0.895</b>               |                                            | <b>0.899</b>               |
| White                                    | 65                                     | 17.0 (13.5; 21.1)          | 257                                  | 67.1 (62.2; 71.6)          | 106                                      | 27.6 (23.4; 32.3)          | 261                                        | 68.0 (63.1; 72.5)          |
| Other than white                         | 19                                     | 22.1 (14.6; 32.1)          | 61                                   | 70.9 (60.5; 79.6)          | 25                                       | 28.7 (20.2; 39.1)          | 60                                         | 69.0 (58.5; 77.8)          |
| <b>Marital status</b>                    |                                        | <b>0.008</b>               |                                      | <b>0.152</b>               |                                          | <b>0.002</b>               |                                            | <b>0.294</b>               |
| Married/with a partner                   | 42                                     | 14.8 (11.1; 19.5)          | 197                                  | 69.6 (64.0; 74.7)          | 67                                       | 23.8 (19.1; 29.1)          | 196                                        | 69.5 (63.9; 74.6)          |
| Without a partner/separated              | 10                                     | 13.9 (7.6; 24.0)           | 52                                   | 72.2 (60.8; 81.3)          | 16                                       | 22.2 (14.1; 33.3)          | 52                                         | 72.2 (60.8; 81.3)          |
| Widow(er)                                | 32                                     | 28.1 (20.6; 37.0)          | 69                                   | 60.5 (51.3; 69.1)          | 48                                       | 41.0 (32.5; 50.2)          | 73                                         | 62.4 (53.3; 70.7)          |
| <b>Economic level<sup>e</sup></b>        |                                        | <b>0.001</b>               |                                      | <b>0.216</b>               |                                          | <b>0.136</b>               |                                            | <b>0.934</b>               |
| A/B                                      | 18                                     | 11.2 (7.1; 17.1)           | 115                                  | 71.4 (64.0; 77.9)          | 38                                       | 23.3 (17.4; 30.4)          | 109                                        | 66.9 (59.3; 73.7)          |
| C                                        | 47                                     | 19.4 (14.9; 24.9)          | 159                                  | 65.7 (59.5; 71.4)          | 72                                       | 29.8 (24.3; 35.8)          | 166                                        | 68.6 (62.5; 74.1)          |
| D/E                                      | 16                                     | 34.8 (22.5; 49.5)          | 27                                   | 58.7 (44.1; 71.9 )         | 17                                       | 37.0 (24.3; 51.7)          | 31                                         | 67.4 (52.7; 79.3)          |
| <b>Education level (completed years)</b> |                                        | <b>&lt;0.001</b>           |                                      | <b>0.288</b>               |                                          | <b>&lt;0.001</b>           |                                            | <b>1.000</b>               |
| None                                     | 15                                     | 27.8 (17.5; 41.1)          | 36                                   | 66.7 (53.1; 77.9)          | 25                                       | 45.5 (32.9; 58.7)          | 38                                         | 69.1 (55.7; 79.9)          |
| 1-7                                      | 58                                     | 22.0 (17.4; 27.4)          | 172                                  | 65.2 (59.2; 70.7)          | 79                                       | 29.7 (24.5; 35.5)          | 181                                        | 68.1 (62.2; 73.4)          |
| ≥8                                       | 10                                     | 6.7 (3.6; 12.0)            | 109                                  | 72.7 (65.0; 79.2)          | 27                                       | 18.1 (12.7; 25.2)          | 101                                        | 67.8 (59.9; 74.8)          |
| <b>Current work situation</b>            |                                        | <b>0.002</b>               |                                      | <b>1.000</b>               |                                          | <b>0.023</b>               |                                            | <b>0.467</b>               |
| Unemployed                               | 71                                     | 21.0 (17.0; 25.7)          | 229                                  | 67.8 (62.6; 72.5)          | 104                                      | 30.5 (25.8; 35.6)          | 66                                         | 65.4 (64.1; 73.9)          |
| Employed                                 | 8                                      | 7.8 (4.0; 14.9)            | 69                                   | 67.7 (58.0; 76.0)          | 19                                       | 18.8 (12.3; 27.7)          | 236                                        | 69.2 (55.6; 74.0)          |

|                                                   |    |                   |     |                    |     |                   |     |                   |
|---------------------------------------------------|----|-------------------|-----|--------------------|-----|-------------------|-----|-------------------|
| <b>Diet quality<sup>f</sup></b>                   |    | <i>0.480</i>      |     | <i>0.878</i>       |     | <i>0.539</i>      |     | <i>0.79</i>       |
| Low                                               | 29 | 20.7 (14.8; 28.2) | 97  | 69.3 (61.1; 76.4)  | 43  | 30.7 (23.6; 38.9) | 92  | 65.7 (57.5; 73.1) |
| Average                                           | 32 | 18.3 (13.2; 24.7) | 117 | 66.9 (59.5; 73.4)  | 49  | 28.0 (21.8; 35.1) | 121 | 69.1 (61.9; 75.6) |
| High                                              | 23 | 15.2 (10.3; 21.9) | 101 | 66.9 (59.0; 73.9)  | 38  | 24.8 (18.6; 32.3) | 105 | 68.6 (60.8; 75.5) |
| <b>Leisure-time physical activity<sup>g</sup></b> |    | <i>0.128</i>      |     | <i>1.000</i>       |     | <i>0.245</i>      |     | <i>0.900</i>      |
| ≤150 min/week                                     | 73 | 19.6 (15.9; 24.0) | 253 | 68.0 (63.1; 72.6)  | 109 | 29.2 (24.8; 34.1) | 255 | 68.4 (63.5; 72.9) |
| >150 min/week                                     | 11 | 12.1 (6.8; 20.6)  | 62  | 68.1 (57.9; 76.9)  | 21  | 22.8 (15.4; 32.5) | 64  | 69.6 (59.4; 78.1) |
| <b>Smoking</b>                                    |    | <i>0.065</i>      |     | <i>0.626</i>       |     | <i>0.053</i>      |     | <i>0.624</i>      |
| Not a smoker                                      | 55 | 21.4 (16.8; 26.9) | 179 | 69.7 (63.7; 75.0)  | 83  | 31.9 (26.5; 37.9) | 177 | 68.1 (62.1; 73.5) |
| Smoker                                            | 10 | 17.6 (9.7; 29.7)  | 38  | 66.7 (53.5; 77.6)  | 10  | 17.5 (9.7; 29.7)  | 36  | 63.2 (50.0; 74.6) |
| Former smoker                                     | 19 | 12.3 (7.9; 18.4)  | 101 | 65.2 (57.3; 72.3)  | 38  | 24.7 (18.5; 32.1) | 108 | 70.1 (62.4; 76.8) |
| <b>Alcohol consumption<sup>h</sup></b>            |    | <i>0.052</i>      |     | <i>0.257</i>       |     | <i>0.059</i>      |     | <i>0.790</i>      |
| No                                                | 70 | 20.0 (16.1; 24.5) | 232 | 66.3 (61.2; 71.1)  | 106 | 30.1 (25.5; 35.1) | 238 | 67.6 (62.5; 72.3) |
| Yes                                               | 14 | 11.8 (7.1; 18.9)  | 86  | 72.3 (63.5; 79.6)  | 25  | 21.0 (14.6; 29.3) | 83  | 69.8 (60.9; 77.3) |
| <b>Multimorbidity</b>                             |    | <i>0.001</i>      |     | <i>0.101</i>       |     | <i>&lt;0.001</i>  |     | <i>0.471</i>      |
| Up to 4 diseases                                  | 18 | 10.3 (6.60; 15.8) | 110 | 63.2 (55.8; 70.1)  | 31  | 17.8 (12.8; 24.2) | 115 | 66.1 (58.7; 72.8) |
| 5 or more diseases                                | 65 | 22.7 (18.2; 28.0) | 202 | 70.6 (65.1; 75.6)  | 99  | 34.3 (29.0; 39.9) | 201 | 69.6 (64.0; 74.6) |
| <b>Depression<sup>i</sup></b>                     |    | <i>0.001</i>      |     | <i>1.000</i>       |     | <i>0.002</i>      |     | <i>0.565</i>      |
| No                                                | 61 | 15.2 (12.0; 19.1) | 271 | 67.6 (62.8; 72.0)  | 100 | 24.9 (20.9; 29.3) | 273 | 67.9 (63.2; 72.3) |
| Yes                                               | 22 | 34.4 (23.8; 46.8) | 43  | 67.2 (54.8; 77.6)  | 29  | 44.6 (33.0; 56.8) | 47  | 72.3 (60.2; 81.8) |
| <b>Polypharmacy<sup>j</sup></b>                   |    | <i>&lt;0.001</i>  |     | <i>1.000</i>       |     | <i>&lt;0.001</i>  |     | <i>0.338</i>      |
| 0-4 medications                                   | 45 | 30.6 (23.7; 38.6) | 100 | 68.0 (60.0; 75.1)  | 59  | 39.9 (32.3; 48.0) | 96  | 64.9 (56.8; 72.1) |
| ≥5 medications                                    | 39 | 12.1 (9.0; 16.2)  | 218 | 67.7 (62.4; 72.6)  | 72  | 22.3 (18.1; 27.2) | 225 | 69.7 (64.4; 74.4) |
| <b>BMI<sup>k</sup></b>                            |    | <i>0.897</i>      |     | <i>0.479</i>       |     | <i>0.924</i>      |     | <i>0.492</i>      |
| <22.0 kg/m <sup>2</sup>                           | 5  | 19.2 (8.2; 38.8)  | 16  | 61.5 (42.0; 77.9)  | 8   | 30.8 (16.2; 50.6) | 15  | 57.7 (38.5; 74.8) |
| 22.0-27.0 kg/m <sup>2</sup>                       | 28 | 18.8 (13.3; 25.9) | 106 | 71.1 (63.3; 77.9)  | 41  | 27.0 (20.5; 34.6) | 105 | 69.1 (61.3; 75.9) |
| >27.0 kg/m <sup>2</sup>                           | 51 | 17.5 (13.6; 22.3) | 194 | 66.7 (61.0; 71.9 ) | 81  | 27.8 (23.0; 33.3) | 201 | 69.1 (63.5; 74.1) |

\*corresponding to the total sample that performed the physical tests at baseline (2014)

\*\*corresponding to the number of individuals who performed the physical tests in 2014 and 2019/20

<sup>a</sup> according to cutoff points recommended by the European Working Group on Sarcopenia in Older People 2 (2019).

<sup>b</sup> declined GS and increased TUG timed = declined physical performance. Clinically relevant changes were defined as a variation  $\geq 0.1$  m/s in the GS and  $\geq 5\%$  in the TUG time from 2014 to 2019-20.

<sup>c</sup> cutoff points according to sample distribution.

<sup>d</sup> Fisher's exact test.

<sup>e</sup> according to *Associação Brasileira de Empresas de Pesquisa* (ABEP): category A/B indicating higher socioeconomic status;

<sup>f</sup> assessed using the Diet Quality Index for the Elderly (*Índice de Qualidade da dieta do idoso* - IDQ-I);

<sup>g</sup> assessed by the International Physical Activity Questionnaire (IPAQ);

<sup>h</sup> alcohol consumption in the last month;

<sup>h</sup> according to the Geriatric Depressive Scale (GDS-10);

<sup>j</sup> continuous use of medications;

<sup>k</sup> cutoff points recommended by Lipschitz et al.

**Table S2: Baseline Gait Speed (GS) and Timed Up and Go (TUG) and change in both tests from 2014 to 2019 in older adults according according to the place of consultation with a health professional in the last year.**

| Variables                                            | Place of consultation (specialized care + emergency service) <sup>a</sup> |                                                       |
|------------------------------------------------------|---------------------------------------------------------------------------|-------------------------------------------------------|
|                                                      | N=348                                                                     |                                                       |
|                                                      | Crude<br><i>p-value</i><br>PR (95%CI)                                     | Adjusted<br><i>p-value</i> <sup>b</sup><br>PR (95%CI) |
| <b>GS (m/s) in 2014<sup>c</sup> (n=1305)</b>         | <i>0.574</i>                                                              | <i>0.599</i>                                          |
| Normal (>0.8 m/s) (n=994)                            | 1.00                                                                      | 1.00                                                  |
| Low (≤0.8 m/s) (n=311)                               | 0.98 (0.92; 1.05)                                                         | 1.02 (0.95; 1.09)                                     |
| <b>Change in GS (2014-2019)<sup>d</sup> (n=476)</b>  | <i>0.992</i>                                                              | <i>0.790</i>                                          |
| Stability-Improvement (n=152)                        | 1.00                                                                      | 1.00                                                  |
| Decline (n=324)                                      | 1.00 (0.95; 1.05)                                                         | 1.01 (0.96; 1.06)                                     |
| <b>TUG (s) in 2014<sup>c</sup> (n=1433)</b>          | <i>0.367</i>                                                              | <i>0.067</i>                                          |
| Normal (≤11 s) (n=1231)                              | 1.00                                                                      | 1.00                                                  |
| Low performance (>11 s) (n=202)                      | 1.02 (0.97; 1.08)                                                         | 1.05 (1.00; 1.11)                                     |
| <b>Change in TUG (2014-2019)<sup>d</sup> (n=471)</b> | <i>0.193</i>                                                              | <i>0.331</i>                                          |
| Stability-Improvement (n=150)                        | 1.00                                                                      | 1.00                                                  |
| Worsening (n=321)                                    | 0.97 (0.92; 1.02)                                                         | 0.98 (0.93; 1.02)                                     |

<sup>a</sup> this variable was dichotomized into: primary care consultation (reference group; N=126) and specialized care + emergency service (N=348)

<sup>b</sup> p-value obtained through robust Poisson regression including variables according to the DAG model: economic level, diet quality, physical activity, multimorbidity, depression, polypharmacy, and BMI.

<sup>c</sup> cutoff point recommended by the European Working Group on Sarcopenia in Older People 2 (2019).

<sup>d</sup> clinically relevant changes were defined as a variation of ≥0.1 m/s in GS and ≥5% in TUG time.

<sup>e</sup> cutoff points according to sample distribution: lower tertile defines low performance.

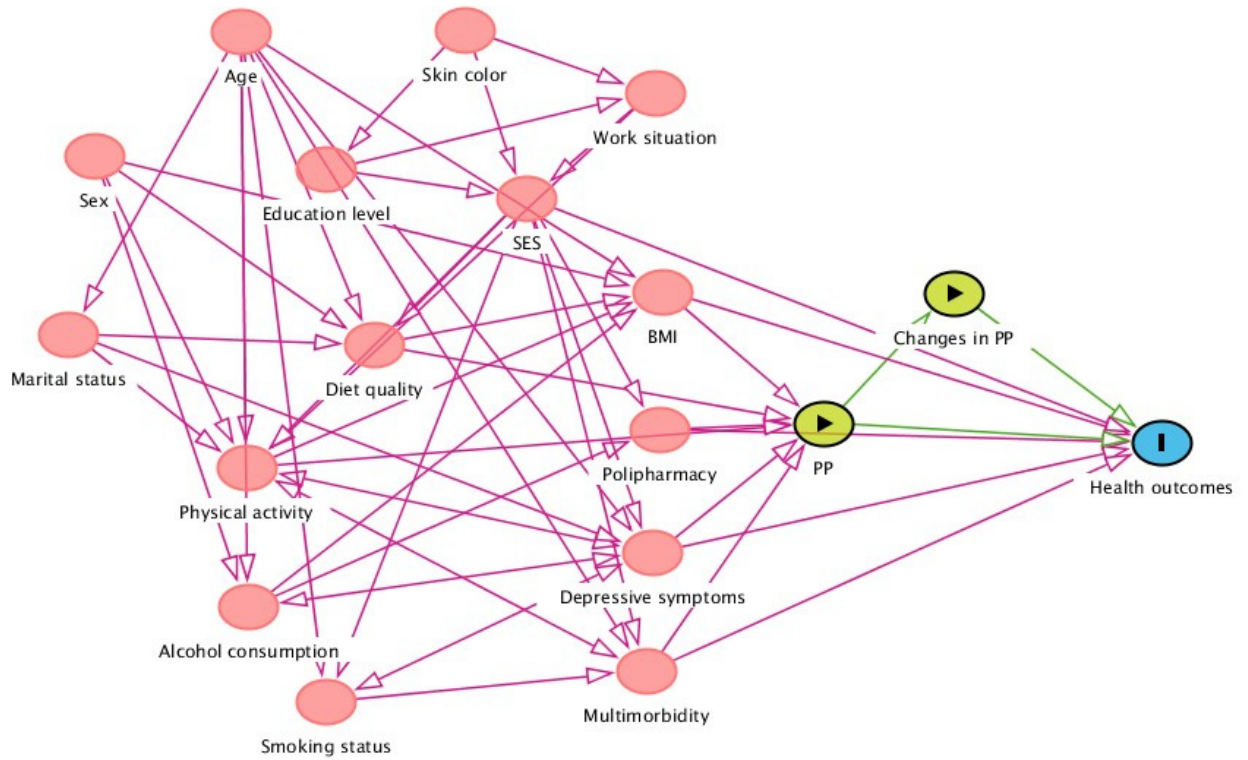

**Figure S1:** Adjustment model including sociodemographic, behavioral and health variables used for statistical analysis. Colors: pink=potential confounders (SES=socioeconomic status, BMI=body mass index); yellow=explanatory variables (PP=physical performance); blue=outcomes (negative health self-perception, consultations with health professionals, physical disability, falls, and hospitalization). Arrows: indicate the direction of the association between the variables (unidirectional or bidirectional).
